1 **Putting RFMix and ADMIXTURE to the test in a complex admixed population**

2

3 Caitlin Uren<sup>1\$</sup>, Eileen G. Hoal<sup>1</sup>, Marlo Möller<sup>1</sup>

4

5 <sup>1</sup> DST-NRF Centre of Excellence for Biomedical Tuberculosis Research, South  
6 African Medical Research Council Centre for Tuberculosis Research, Division of  
7 Molecular Biology and Human Genetics, Faculty of Medicine and Health Sciences,  
8 Stellenbosch University, Cape Town, South Africa

9

10 \$ Correspondence should be addressed to:

11 Dr. Caitlin Uren, Room 4036, 4<sup>th</sup> Floor Education Building, Francie van Zijl Drive,  
12 DST-NRF Centre of Excellence for Biomedical Tuberculosis Research, South African  
13 Medical Research Council Centre for Tuberculosis Research, Division of Molecular  
14 Biology and Human Genetics, Faculty of Medicine and Health Sciences,  
15 Stellenbosch University, Cape Town, 8000, South Africa

16 Phone: 021 938 9692

17 E-mail: [caitlinu@sun.ac.za](mailto:caitlinu@sun.ac.za)

18

19 **Running title:** Accuracy of global & local ancestry

20

21 **ORCID ID's:**

22 CU - 0000-0003-2358-0135

23 EGH - 0000-0002-6444-5688

24 MM - 0000-0002-0805-6741

25

26 **Abstract**

27

28 Global and local ancestry inference in admixed human populations can be performed  
29 using computational tools implementing distinct algorithms, such as RFMix and  
30 ADMIXTURE. The accuracy of these tools has been tested largely on populations  
31 with relatively straightforward admixture histories but little is known about how well  
32 they perform in more complex admixture scenarios. Using simulations, we show that  
33 RFMix outperforms ADMIXTURE in determining global ancestry proportions in a  
34 complex 5-way admixed population. In addition, RFMix correctly assigns local  
35 ancestry with an accuracy of 89%. The increase in reported local ancestry inference  
36 accuracy in this population (as compared to previous studies) can largely be  
37 attributed to the recent availability of large-scale genotyping data for more  
38 representative reference populations. The ability of RFMix to determine global and  
39 local ancestry to a high degree of accuracy, allows for more reliable population  
40 structure analysis, scans for natural selection, admixture mapping and case-control  
41 association studies. This study highlights the utility of the extension of computational  
42 tools to become more relevant to genetically structured populations, as seen with  
43 RFMix. This is particularly noteworthy as modern-day societies are becoming  
44 increasingly genetically complex and some genetic tools are therefore less  
45 appropriate. We therefore suggest that RFMix be used for both global and local  
46 ancestry estimation in complex admixture scenarios.

47

48

49 **Keywords:** South Africa; local ancestry inference; population genetics; RFMix;

50 ADMIXTURE

## 51 **Introduction**

52

53 Admixture, the exchange of genetic material between distinct populations, is a  
54 hallmark of modern society - it can occur between closely or distantly related  
55 populations (both genetically and geographically) (1000 Genomes Project  
56 Consortium *et al.* 2012). This exchange of genetic material leads to population  
57 structure; the pattern, timing and extent has been investigated in detail in a number  
58 of populations (1000 Genomes Project Consortium *et al.* 2012; Gurdasani *et al.*  
59 2015; Uren *et al.* 2016). Such studies on southern African populations are  
60 particularly noteworthy as this area is postulated to be the geographical origin of  
61 modern humans and therefore investigating population structure in modern southern  
62 African populations may reveal more about the area's rich history (Henn *et al.* 2011).

63

64 Correctly and efficiently determining ancestral proportions in an admixed population  
65 is possible by using computational and statistical algorithms that adapt to a variety of  
66 demographic scenarios (Alexander *et al.* 2009; Maples *et al.* 2013; Brown and  
67 Pasaniuc 2014). Furthermore, the ability to determine the ancestral origin of a  
68 particular chromosomal region in an admixed individual has enabled the mapping of  
69 the origins of genetic risk factors in complex disease i.e. admixture mapping  
70 (Freedman *et al.* 2006; Cheng *et al.* 2009; Daya *et al.* 2014). The majority of the  
71 computational and statistical tools used for global and local ancestry were however  
72 tested on and tailored to 2- to 3-way admixed populations. The extension to a  
73 complex 5-way admixed population and the evaluation of the resulting accuracy as  
74 we present here, has rarely been done. (Daya *et al.* 2014; Uren *et al.* 2016).

75

76 A South African population with unique genetic ancestry and 5-way admixture (the  
77 South African Coloured (SAC) population as termed in the South African census)  
78 received ancestral contributions from Bantu-speaking African (~30%), KhoeSan  
79 (~30%), European (~20%), East Asian (~10%) and South East Asian populations  
80 (~10%) (de Wit *et al.* 2010; Chimusa *et al.* 2013; Uren *et al.* 2016). The admixture  
81 began approximately 15 generations ago and followed a continuous migration model  
82 (Uren *et al.* 2016). This number, mode and timing of admixture events is unique and  
83 creates a highly complex population. Although we are able to describe the  
84 demographic model for most populations, there are some gaps in knowledge. This  
85 may include not knowing which populations or specific geographical locations are the  
86 best proxies for the true ancestral populations. Therefore, any studies investigating  
87 an association between genetics and disease risk needs to be able to correctly  
88 account for population or even individual admixture proportions within the limits of  
89 the availability of current genetic data.

90

91 The first step in a study design aimed at finding a link between ancestry and disease  
92 (such as genome-wide association studies and admixture mapping) is to understand  
93 the ancestral composition of the study population. Ancestral origins and contributions  
94 to the 5-way admixed South African population have been estimated but there have  
95 been very few studies that have investigated the accuracy of the results generated  
96 by the computational algorithm used (de Wit *et al.* 2010; Chimusa *et al.* 2013;  
97 Petersen *et al.* 2013; Daya *et al.* 2013; Uren *et al.* 2016). Here we have set out to  
98 test the accuracy of global and local ancestry inference in one of the most complex  
99 admixed populations world-wide, using newly available dense genotyping data. A  
100 simulated 5-way admixed population is generated and global and local ancestry

101 estimates are compared to the true values to determine the accuracy of the  
102 computational algorithm.

103

## 104 **Methods**

105

### 106 **Data merging and filtering**

107

108 KhoeSan genotype data from Martin and colleagues (Martin *et al.* 2017) was merged  
109 with the PAGEII dataset (Wojcik *et al.* 2018). In order to increase the number of  
110 European and South East Asian reference samples in the dataset, the data was  
111 merged with Gujarati Indian and European genetic data from the 1000 Genomes  
112 Project (1000 Genomes Project Consortium (2010) 2010).

113

114 Preliminary data filtering included a filter for minor allele frequency (0.003),  
115 missingness per genotype (max 0.05) and missingness per individual (max 0.01). A  
116 total of ~776k SNPs passed these filters and formed the initial merged dataset.  
117 Further data filtering is described in the appropriate sections below. Data was  
118 phased using SHAPEIT2 utilizing a recombination map averaged across European  
119 and African populations (The International HapMap Consortium 2007; O'Connell *et*  
120 *al.* 2014). A summary of the populations in the final dataset can be seen in Table 1.

121

### 122 **Simulations**

123

124 The computational workflow is summarized in Figure 1. A subset of reference  
125 individuals from the final merged dataset described in Table 1 was used to generate

126 a simulated dataset using admix-simu (Williams 2016). A demographic model  
127 consisting of the ancestry proportions described above and a continuous migration  
128 model starting at 15 generations ago (Uren et al. (2016)), was used to generate a  
129 simulated 5-way admixed population (Uren *et al.* 2016). This simulation results in a  
130 heterogenous population, reminiscent of a real-world SAC population. The simulation  
131 does not take post-admixture selection into account since it is highly unlikely that 350  
132 years would result in distinct selection signals, rather, the inherent selection signals  
133 in the source populations will be transferred in a random manner to the simulated  
134 admixed population. Genotype as well as local ancestry calls were generated for this  
135 simulated dataset from real reference haplotypes, thus capturing the complexity of  
136 this heterogenous 5-way admixed South African population.

137

138

### 139 **Software choices**

140

141 Although there are a number of software programs that are able to estimate global  
142 ancestry, ADMIXTURE is the most utilized. Reasons for this include the ability to  
143 include related individuals in one run and to generate accurate admixture proportions  
144 using relatively low-density SNP-array data (Alexander *et al.* 2009). The other widely  
145 used global ancestry algorithm, STRUCTURE has been shown to overestimate  
146 admixture proportions in complex populations (Cheng *et al.* 2017).

147

148 RFMix was chosen as the local ancestry inference algorithm of choice as it allows for  
149 parameter optimization given the number of ancestral populations, has the inherent  
150 ability to calculate local and global ancestry simultaneously, allows for array-based

151 input data as well as whole genome sequencing data, and has a proven track record  
152 with admixed populations (Maples *et al.* 2013; Padhukasahasram 2014).  
153 Furthermore, during a preliminary study by Daya and colleagues, RFMix was shown  
154 to be the most accurate tool for local ancestry estimation in this 5-way admixed  
155 South African population (Daya *et al.* 2014).

156

### 157 **GAI accuracy**

158

159 Reference individuals not included in the dataset used for the simulation, were  
160 allocated to the dataset used for global and local ancestry inference. Global ancestry  
161 proportions were determined by ADMIXTURE (Alexander *et al.* 2009) and RFMix  
162 (Maples *et al.* 2013).

163

164 The ADMIXTURE analysis was performed in an unsupervised manner after filtering  
165 the dataset for linkage disequilibrium as per recommendations in the ADMIXTURE  
166 manual (50kb window size, step size of 10kb and  $R^2$  threshold of 0.1). Relatedness  
167 in the reference dataset was assessed using king (Manichaikul *et al.* 2010) and all  
168 second degree relatives were removed prior to admixture analysis.

169

170 RFMix was run using default parameters, a time since admixture of 15 generations  
171 (in line with the simulation) as well as 3 expectation-maximization (EM) iterations  
172 (further EM iterations were not shown to increase accuracy (Maples *et al.* 2013)).

173 The correlation of the two methods by means of the Root Mean Squared Error was  
174 performed in R.

175

176 **LAI accuracy**

177

178 Local ancestry calls were generated by RFMix using the same parameters as  
179 described in the previous section.

180

181 The ability to correctly assign local ancestry was calculated in two ways. The first  
182 determined the global accuracy i.e. how often the computational tool assigned the  
183 correct ancestry (as per the simulations) and the second looked at this accuracy per  
184 ancestral population (Atkinson 2018). These accuracy estimators were then  
185 averaged over all individuals in the simulated 5-way admixed dataset.

186

187

188 **Data Availability**

189

190 No new genetic data was generated for this study however all reference data  
191 supporting the findings of this study are available via the original publication.

192

193

194 **Results and discussion**

195

196 The aim of this study was to determine the accuracy of global and local ancestry  
197 inference. In order to do this, a highly complex 5-way admixed population was  
198 simulated. The local and global ancestry estimates were then compared to the true  
199 simulated data.

200



201

## 202 **Global Ancestry Inference Accuracy**

203 The genetic diversity inherent in an admixed South African population was simulated  
204 using 5 reference populations (see Methods). The average ancestry proportions  
205 across these individuals were in line with what is seen in the real-world (Table 2)  
206 (Uren *et al.* 2016). The simulations provided the basis with which the global ancestry  
207 proportions as calculated by ADMIXTURE (Alexander *et al.* 2009) and RFMix  
208 (Maples *et al.* 2013) could be compared.

209

210 Unsupervised admixture analysis of the simulated dataset by ADMIXTURE and  
211 RFMix confirmed that the simulated 5-way admixed population is highly  
212 heterogenous. Average ancestral proportions for both computational tools are given  
213 in Table 2. The comparisons across the 5 ancestries for each simulated individual  
214 are also depicted in Figure 2. Root Mean Squared Errors (RMSE) (RFMix vs  
215 Simulation and ADMIXTURE vs simulation) were calculated for each ancestry. As  
216 per the RMSE's, RFMix outperforms ADMIXTURE in correctly estimating admixture  
217 proportions in the 5-way admixed population, with the exception of East Asian  
218 ancestry where the accuracy is equal. ADMIXTURE over-estimates the Bantu-  
219 speaking African contribution and under-estimates the KhoeSan ancestral  
220 proportions. ADMIXTURE also overestimates European ancestry and  
221 underestimates South East Asian ancestry. This is most likely due to inherent  
222 European ancestry present in South East Asian populations and similarly, Bantu-  
223 speaking ancestry in the KhoeSan reference population. It is likely that if more  
224 homogenous reference populations were chosen, this trend would be negated but,

225 as previously mentioned, most modern day populations are admixed and therefore  
226 computational tools should be able to account for this within the algorithms.

227

228 In addition, we hypothesize that the discrepancy in admixture proportions between  
229 RFMix and ADMIXTURE can also be attributed to the increase in prior information  
230 given to RFMix in order to determine admixture proportions i.e. phase and  
231 recombination rate.

232

233

#### 234 **Local Ancestry Inference Accuracy**

235 Beyond global ancestry proportions, the simulation of a 5-way admixed population  
236 resulted in known local ancestry calls, to which calls by a computational tool can be  
237 compared. The ancestral origin of each parental chromosomal region was  
238 determined using RFMix. RFMix has been shown to outperform other computational  
239 tools in the estimation of local ancestry in complex admixture scenarios (Daya *et al.*  
240 2014). The local ancestry calls by RFMix were compared to the “true” simulated  
241 ancestral origin of each region (Figure 3). The overall local ancestry inference  
242 accuracy across all individuals and ancestries is ~89%; 88% accurate in calling  
243 Bantu-speaking African ancestry, 87% calling KhoeSan ancestry, 95% calling  
244 European ancestry, 86% calling East Asian ancestry and 85% calling South East  
245 Asian ancestry. The statistical significance of RFMix’s ability to call a specific  
246 ancestry over another was assessed. RFMix is able to call European ancestry more  
247 precisely than any of the African or Asian ancestries and it was able to call KhoeSan  
248 ancestry more accurately than East Asian ancestry (Figure 3). This is consistent with

249 what was previously found and confirms that these algorithms are not tailored to  
250 African populations (Maples *et al.* 2013).

251

252 The local ancestry inference accuracy estimates presented here are substantially  
253 higher than previously obtained for this 5-way admixed South African population  
254 (Daya *et al.* 2014). This increased accuracy can be attributed largely to the recent  
255 availability of large-scale genotyping array data from the KhoeSan population which  
256 is used as a reference for this admixed population. This, in addition to the overall  
257 higher SNP density, increased the accuracy from ~70% (as previously reported  
258 (Daya *et al.* 2014)) to ~89%. As new datasets become available and the overlap  
259 between datasets increases, we envisage this accuracy increasing even further.

260

261

## 262 **Conclusion**

263

264 In conclusion, the findings presented here detail the accuracy of global and local  
265 ancestry inference of one of the most complex populations worldwide, which puts  
266 ADMIXTURE and RFMix to the ultimate test. Due to the accuracy and versatility of  
267 RFMix in determining global and local ancestry in a single program, it should be the  
268 algorithm of choice to characterize more complex admixture scenarios. The inclusion  
269 of accurate admixture proportions as a covariate in association studies is vital, and it  
270 is our opinion that researchers studying complex admixed populations should use  
271 RFMix for this purpose.

272

273 Furthermore, we demonstrate that computational tools *are* able to decipher the  
274 complex African genetic history with a high degree of accuracy, but there is still  
275 some room for improvement regarding the tailoring of computational tools to handle  
276 diverse, admixed reference and target populations under study.

277

278 As populations become increasingly mobile, the probability of admixture is greater  
279 and the extension of these and future computational tools to more genetically  
280 complex populations across the world is vital and, as we have demonstrated, is  
281 possible. The conclusions of this study will be increasingly relevant and  
282 generalizable.

283

284

## 285 **Acknowledgements**

286

287 We thank Dr. Brenna Henn and Dr. Elizabeth Atkinson for their assistance and  
288 support of this research. We thank the study participants of the projects cited here -  
289 without their contribution, this research would not be possible.

290

291

## 292 **Author Contributions**

293

294 CU designed the study, wrote the first draft of the manuscript and performed the  
295 computational analyses. MM and EH helped to develop the research and edited the  
296 manuscript.

297

298

## 299 **Funding**

300

301 This research was funded (partially or fully) by the South African government through  
302 the South African Medical Research Council and the National Research Foundation.  
303 CU was supported by a fellowship from the Claude Leon Foundation.

304

## 305 **Conflict of Interest**

306

307 The authors declare that they have no conflict of interest.

308

309

## 310 **Ethical Approval and Informed Consent**

311

312 All procedures performed in studies involving human participants were in accordance  
313 with the ethical standards of the institutional and/or national research committee and  
314 with the 1964 Helsinki declaration and its later amendments or comparable ethical  
315 standards. Informed consent was obtained from all individual participants included in  
316 the study. This study was approved by the Stellenbosch University Health Research  
317 Ethics Committee (Reference #N11/07/210).

318

319

## 320 **References**

321

- 322 1000 Genomes Project Consortium (2010), 2010 A map of human genome variation  
323 from population-scale sequencing. *Nature* 467: 1061–1073.
- 324 1000 Genomes Project Consortium, G. R. Abecasis, A. Auton, L. D. Brooks, M. A.  
325 DePristo *et al.*, 2012 An integrated map of genetic variation from 1,092 human  
326 genomes. *Nature* 491: 56–65.
- 327 Alexander, D. H., J. Novembre, and K. Lange, 2009 Fast model-based estimation of  
328 ancestry in unrelated individuals. *Genome Res.* 19: 1655–1664.
- 329 Atkinson, E., 2018 *Calculations of accuracy comparing Williams lab simulations to*  
330 *RFmix runs: eatkinson/LAaccuracy.*
- 331 Brown, R., and B. Pasaniuc, 2014 Enhanced methods for local ancestry assignment  
332 in sequenced admixed individuals. *PLoS Comput. Biol.* 10: e1003555.
- 333 Cheng, C. Y., W. H. Kao, N. Patterson, A. Tandon, C. A. Haiman *et al.*, 2009  
334 Admixture mapping of 15,280 African Americans identifies obesity  
335 susceptibility loci on chromosomes 5 and X. *PLoS.Genet* 5: e1000490.
- 336 Cheng, J. Y., T. Mailund, and R. Nielsen, 2017 Fast admixture analysis and  
337 population tree estimation for SNP and NGS data. *Bioinformatics* 33: 2148–  
338 2155.
- 339 Chimusa, E. R., M. Daya, M. Möller, R. Ramesar, B. M. Henn *et al.*, 2013  
340 Determining ancestry proportions in complex admixture scenarios in South  
341 Africa using a novel proxy ancestry selection method. *PLoS ONE* 8: e73971.
- 342 Daya, M., L. van der Merwe, U. Galal, M. Möller, M. Salie *et al.*, 2013 A Panel of  
343 Ancestry Informative Markers for the Complex 5-way Admixed South African  
344 Coloured Population. *PLoS ONE* 8: e82224.

- 345 Daya, M., L. van der Merwe, C. R. Gignoux, P. D. van Helden, M. Möller *et al.*, 2014  
346 Using multi-way admixture mapping to elucidate TB susceptibility in the South  
347 African Coloured population. *BMC Genomics* 15: 1021.
- 348 Freedman, M. L., C. A. Haiman, N. Patterson, G. J. McDonald, A. Tandon *et al.*,  
349 2006 Admixture mapping identifies 8q24 as a prostate cancer risk locus in  
350 African-American men. *Proc.Natl.Acad.Sci.U.S.A* 103: 14068–14073.
- 351 Gurdasani, D., T. Carstensen, F. Tekola-Ayele, L. Pagani, I. Tachmazidou *et al.*,  
352 2015 The African Genome Variation Project shapes medical genetics in  
353 Africa. *Nature* 517: 327–332.
- 354 Henn, B. M., C. R. Gignoux, M. Jobin, J. M. Granka, J. M. Macpherson *et al.*, 2011  
355 Hunter-gatherer genomic diversity suggests a southern African origin for  
356 modern humans. *Proc. Natl. Acad. Sci. U.S.A.* 108: 5154–5162.
- 357 Manichaikul, A., J. C. Mychaleckyj, S. S. Rich, K. Daly, M. Sale *et al.*, 2010 Robust  
358 relationship inference in genome-wide association studies. *Bioinformatics* 26:  
359 2867–2873.
- 360 Maples, B. K., S. Gravel, E. E. Kenny, and C. D. Bustamante, 2013 RFMix: a  
361 discriminative modeling approach for rapid and robust local-ancestry  
362 inference. *Am. J. Hum. Genet.* 93: 278–288.
- 363 Martin, A. R., M. Lin, J. M. Granka, J. W. Myrick, X. Liu *et al.*, 2017 An Unexpectedly  
364 Complex Architecture for Skin Pigmentation in Africans. *Cell* 171: 1340-  
365 1353.e14.
- 366 O’Connell, J., D. Gurdasani, O. Delaneau, N. Pirastu, S. Ulivi *et al.*, 2014 A General  
367 Approach for Haplotype Phasing across the Full Spectrum of Relatedness.  
368 *PLOS Genet* 10: e1004234.

- 369 Padhukasahasram, B., 2014 Inferring ancestry from population genomic data and its  
370 applications. *Front. Genet.* 5:.
- 371 Petersen, D. C., O. Libiger, E. A. Tindall, R.-A. Hardie, L. I. Hannick *et al.*, 2013  
372 Complex Patterns of Genomic Admixture within Southern Africa. *PLOS Genet*  
373 9: e1003309.
- 374 The International HapMap Consortium, 2007 A second generation human haplotype  
375 map of over 3.1 million SNPs. *Nature* 449: 851–861.
- 376 Uren, C., M. Kim, A. R. Martin, D. Bobo, C. R. Gignoux *et al.*, 2016 Fine-Scale  
377 Human Population Structure in Southern Africa Reflects Ecogeographic  
378 Boundaries. *Genetics* 204: 303–314.
- 379 Williams, A., 2016 *admix-simu: admix-simu: program to simulate admixture between*  
380 *multiple populations.*
- 381 de Wit, E., W. Delpont, C. E. Rugamika, A. Meintjes, M. Moller *et al.*, 2010 Genome-  
382 wide analysis of the structure of the South African Coloured Population in the  
383 Western Cape. *Hum.Genet.* 128: 145–153.
- 384 Wojcik, G., M. Graff, K. K. Nishimura, R. Tao, J. Haessler *et al.*, 2018 The PAGE  
385 Study: How Genetic Diversity Improves Our Understanding of the Architecture  
386 of Complex Traits. *bioRxiv* 188094.

387

## 388 **Figure Legends:**

### 389 **Figure 1:** Computational workflow

390

391 The number (n) of individuals included in each dataset, over all ancestral  
392 populations. For details, please see the methods section.

393



394 **Figure 2:** Comparison between observed global ancestry proportions and “true”  
395 proportions showing RFMix performs more accurately than ADMIXTURE in ancestry  
396 determination.

397

398 Admixture proportions calculated by ADMIXTURE are in black and RFMix in red.  
399 Root Mean Square Errors for every comparison are shown.

400

401

402 **Figure 3:** Boxplot showing the accuracy with which RFMix assigns an ancestral  
403 origin to a genetic region, stratified by reference population.

404

405 The median (bold horizontal line) and the upper and lower quartiles are shown. Data  
406 falling outside this range are plotted as outliers. The differences in accuracies across  
407 ancestries were assessed using a Wilcoxon non-parametric test. All statistically  
408 significant p values ( $< 0.01$ ) are shown.

**Table 1: Population characteristics of the final merged dataset**

| <b>Population</b>               | <b>Number of individuals included</b> |
|---------------------------------|---------------------------------------|
| KhoeSan (Nama and ≠Khomani San) | 284                                   |
| European (British)              | 79                                    |
| African (Yoruba and Luhya)      | 35                                    |
| East Asian (Han)                | 50                                    |
| South East Asian (Gujarati)     | 103                                   |

**Table 2: Average admixture proportions**

|                        | Previously Reported (Uren <i>et al.</i> 2016) (%) | Simulation (%) | ADMIXTURE (%) | RFMix (%) |
|------------------------|---------------------------------------------------|----------------|---------------|-----------|
| Bantu-speaking African | 32                                                | 27             | 33            | 26        |
| KhoeSan                | 30                                                | 33             | 25            | 33        |
| European               | 19                                                | 22             | 26            | 23        |
| East Asian             | 7                                                 | 6              | 7             | 6         |
| South East Asian       | 12                                                | 12             | 9             | 12        |

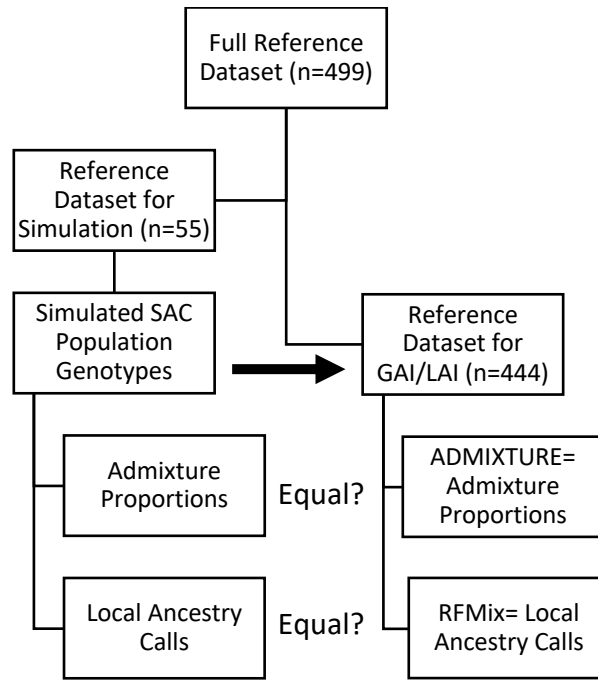

### Bantu Speaking African

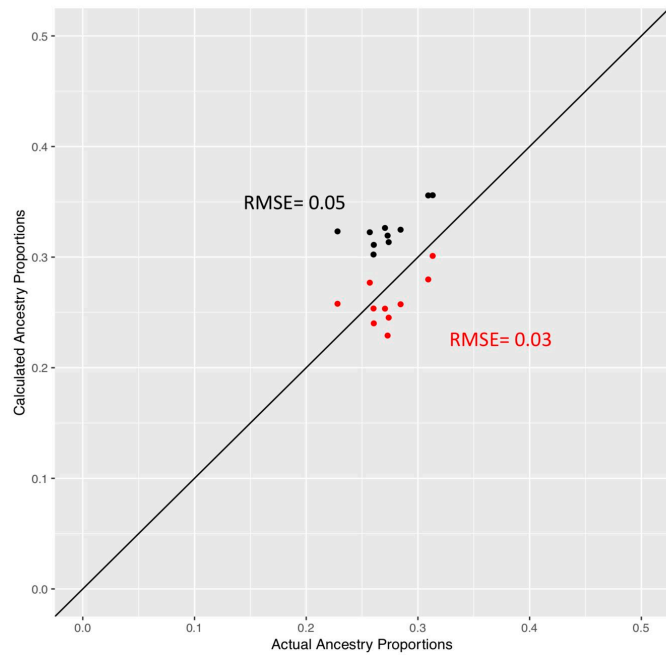

### KhoeSan

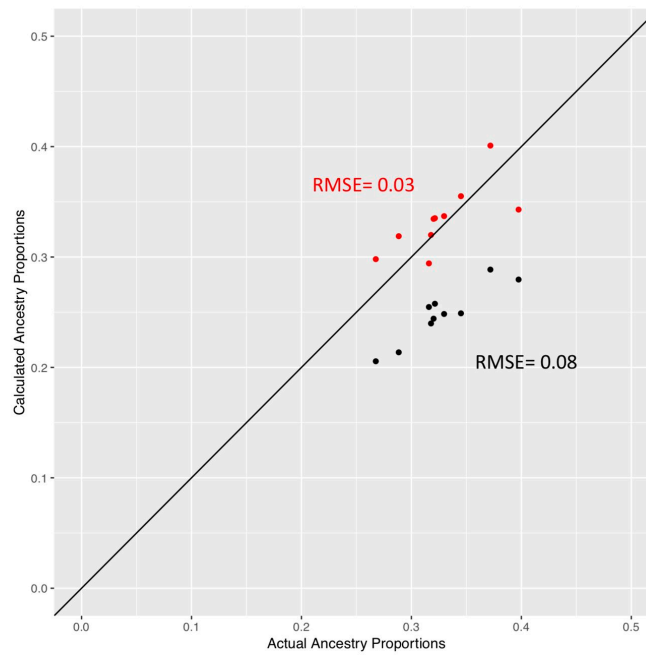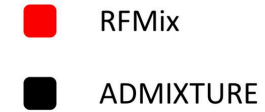

### European

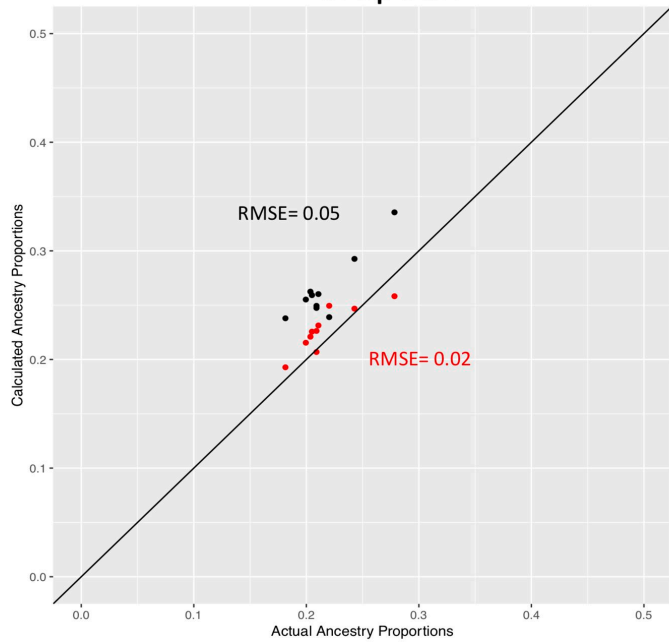

### East Asian

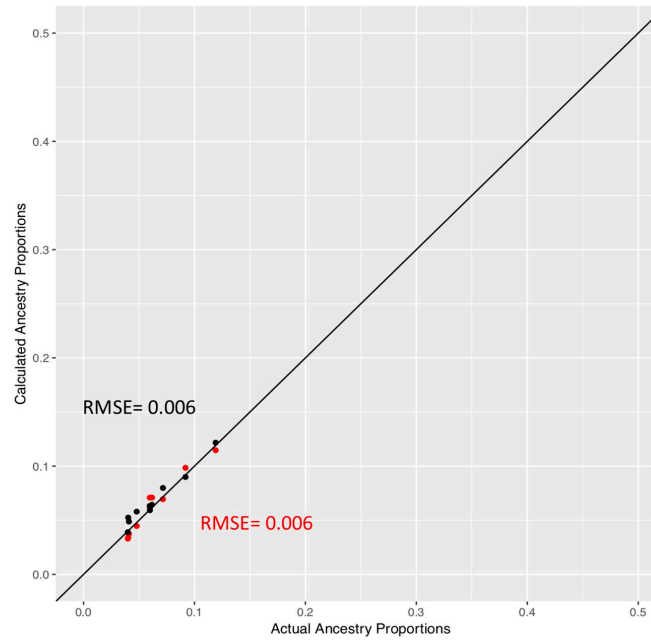

### South Asian

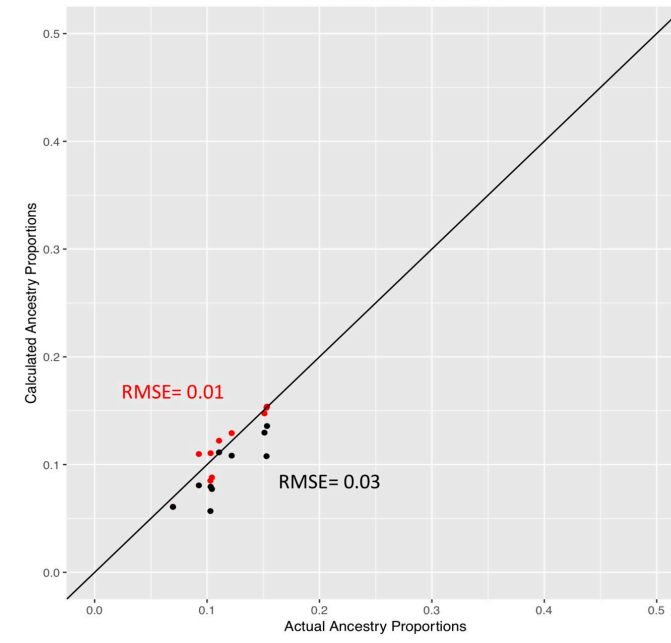

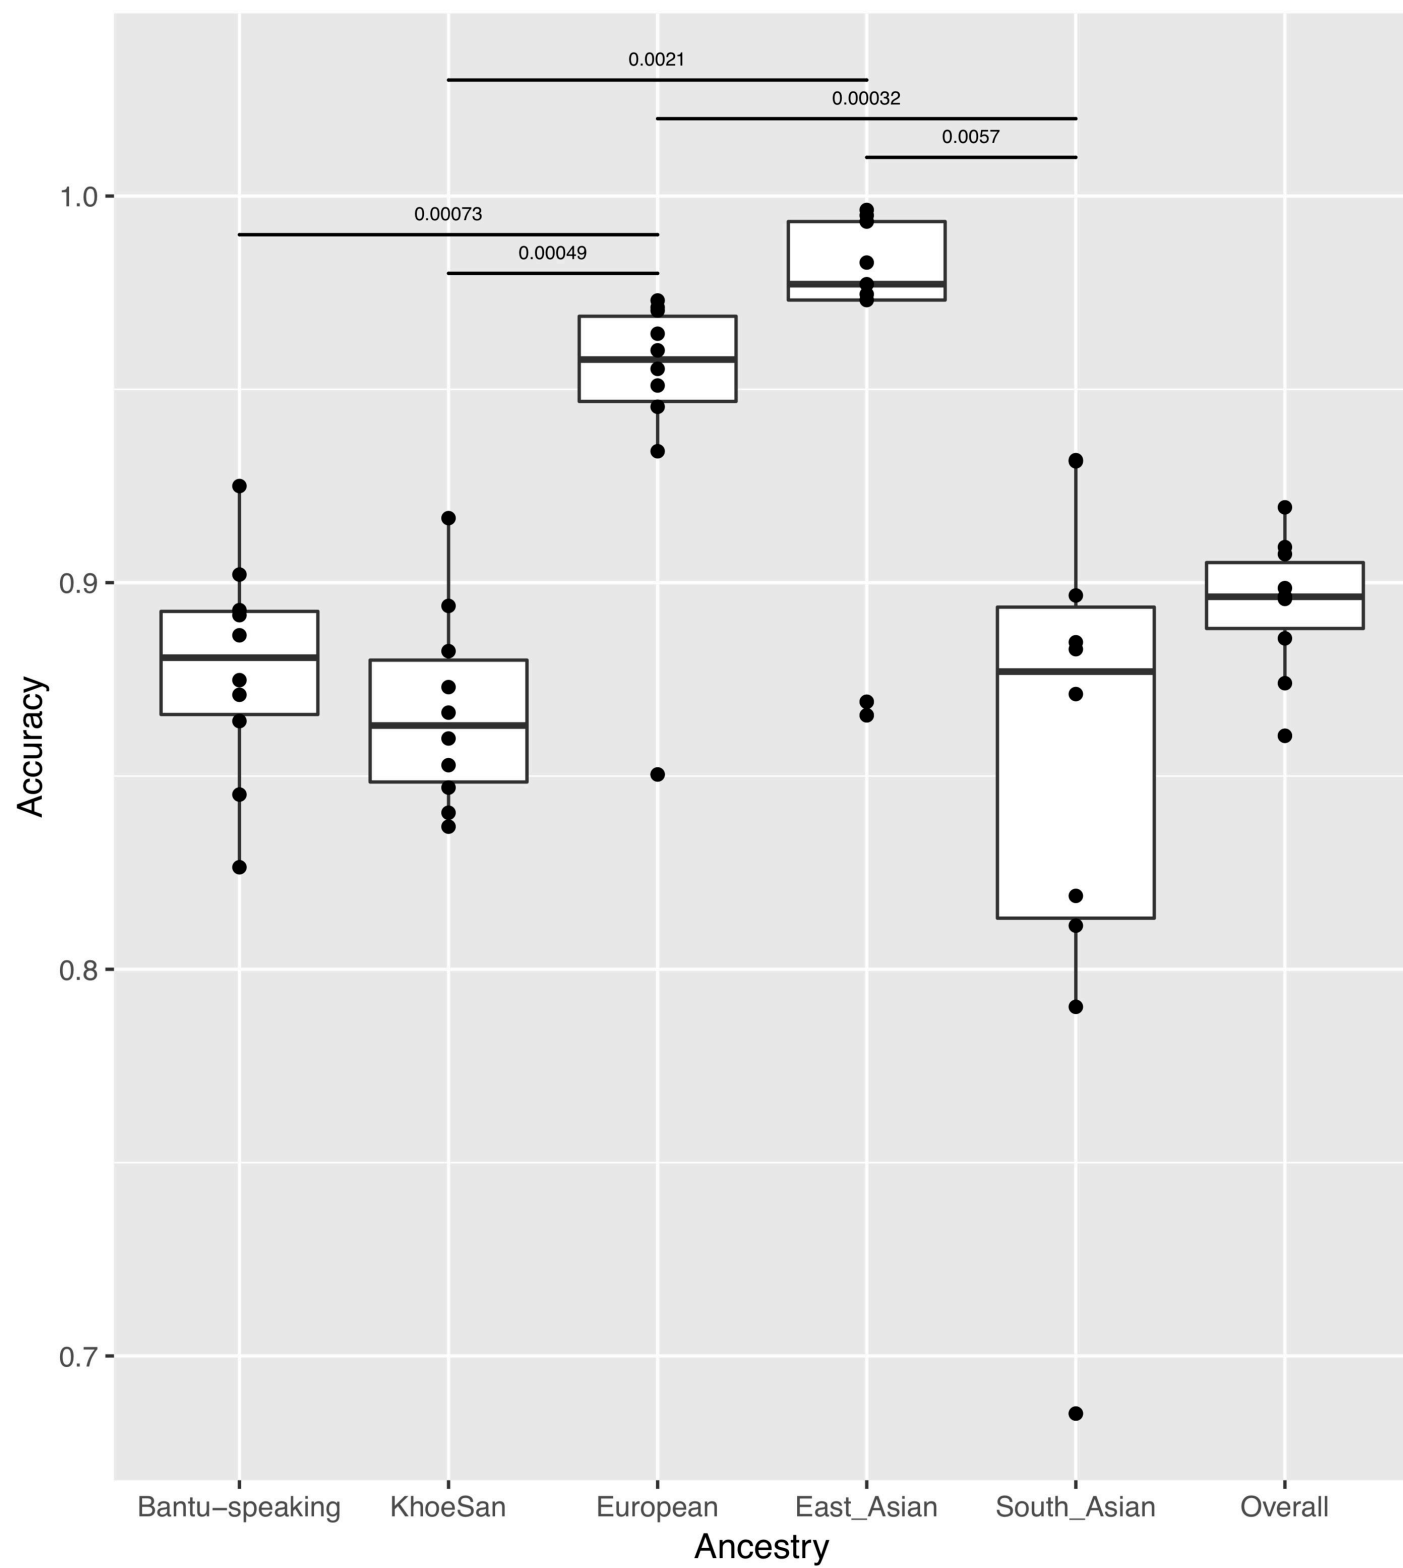

Source: https://www.biorxiv.org/content/10.1101/671727v1.full.pdf
